# Supplementary material
Source: PubMed Central journal article supplement (PMC8579757)
Supplement: mmc1.pdf [file mmc1.pdf]

# Online Appendix to 'Market Shocks and Professionals' Investment Behavior—Evidence from the COVID-19 crash'

Christoph Huber, Jürgen Huber, Michael Kirchler<sup>13</sup>

## A Instructions of the Experiment

Dear participant,

Thank you very much for accepting our invitation to take part in this short online experiment. It takes approximately 15 minutes. The experiment has real monetary incentives and the payoff will vary depending on your decisions.

All data will be anonymous and no individual results will be disclosed publicly or to other participants of the experiment.

Please do not use your mobile phone or tablet — visibility is much better on a computer screen. The experiment is open for the upcoming 4 weeks. If the maximum number of participants has been reached before this deadline, we will close the experiment.

Thank you very much for your contribution to science and good luck in the experiment!

————— (new page) —————

### *The Experiment*

The following experiment consists of three parts. In each of the three parts, you will make investment decisions in a financial market. In each part, you have to decide in each of five months/rounds, which percentage of your wealth you want to invest in the risky stock shown in this part. The wealth not invested is held in cash.

The risky stocks' returns in all parts are based on a distribution of returns from actual historical data of large stock indices from the last 20 years. During this time, the stock indices' development was characterized by fluctuations. The distribution of daily returns for the risky stocks corresponds to earning an average daily return of 0.03% (that corresponds to an average yearly return of 6.44%) with a standard deviation of daily returns of 2.36%.

Here are some examples on the likelihood of various price fluctuations:

- In 50 out of 100 cases, the daily return is between -0.60% and 0.73%.
- In 90 out of 100 cases, the daily return is between -2.77% and 2.77%.
- In 95 out of 100 cases, the daily return is between -6.06% and 6.32%.

————— (new page) —————

### *Procedure*

---

<sup>13</sup>All materials of the experiment (e.g., source codes, data files) can be found public in the Open Science Framework (OSF) repository [osf.io/9chg8](https://osf.io/9chg8).

Each of the three parts consists of five months. At the start of each month you can invest between 0% and 100% of your wealth in the respective risky stock. If you invest less than 100% of your wealth in the risky stock, the amount not invested in the risky stock is held in cash.

Each month consists of 20 trading days and therefore contains 20 daily returns. Every 0.5 seconds, one daily return from the distribution described above is realized and displayed on the screen.

---

(new page)

---

### *Payment*

At the end of the experiment, one of the five months from one of the three parts will be randomly selected to determine your payment. Your percentage return from this randomly selected month times three is then added to an endowment of EUR 20.

Example: If you invest 70% of your wealth in the risky stock in the randomly selected month and the stock's return in this month is 15%, then your return from this month will be  $70\% \times 15\% = 10.5\%$ . Your payment from this experiment is then  $\text{EUR } 20 \times (1 + 10.5\% \times 3) = \text{EUR } 26.30$ .

---





## B Additional Figures

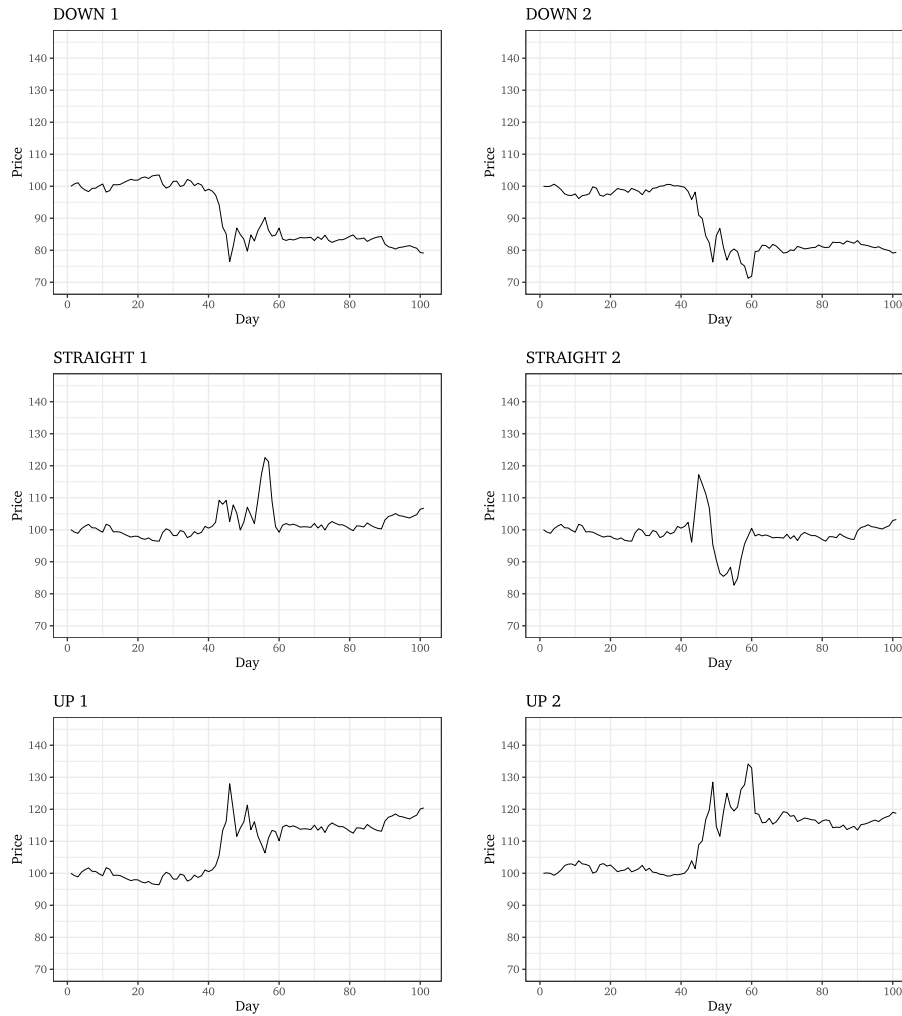

Figure B1: Price Charts: Overview over the six price paths run in the experiment. The shocks are modelled in period three. Each subject is presented with each of the path-types DOWN, STRAIGHT, and UP in random order in such a way that a subject either sees DOWN 1 and UP 2 or vice versa.

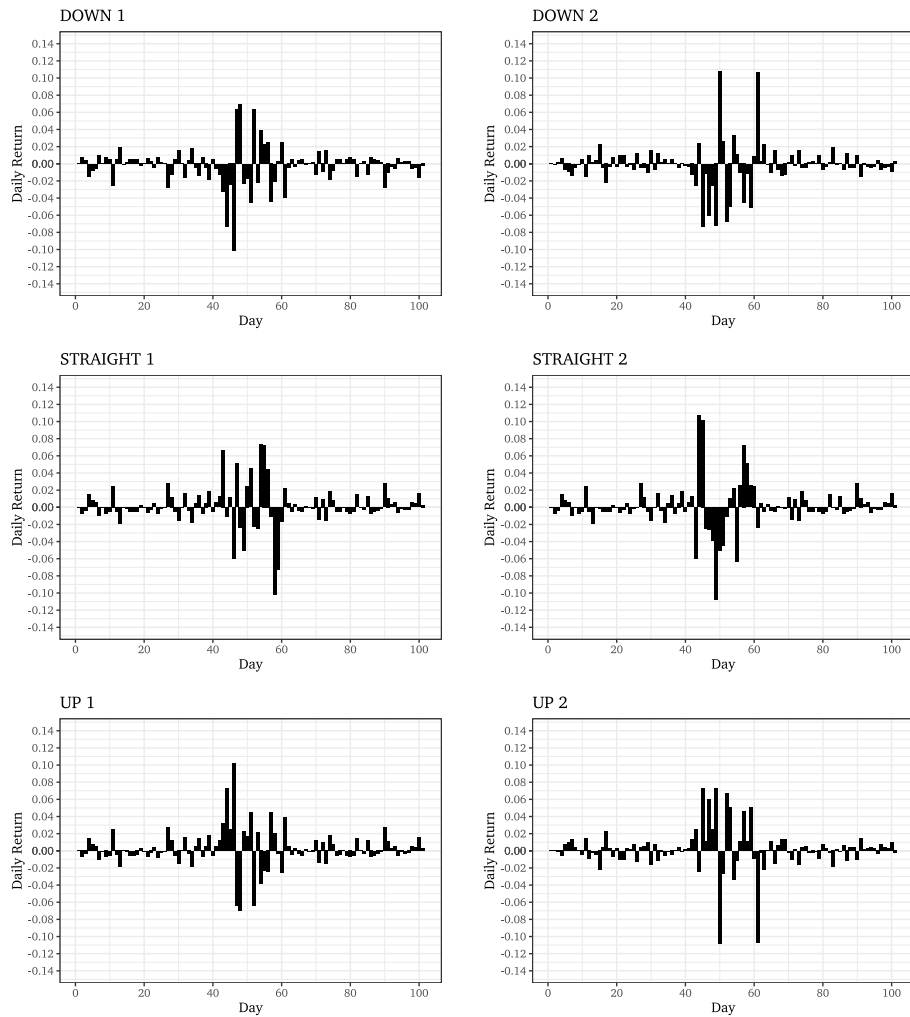

Figure B2: Return Charts: Overview over the six return paths run in the experiment. The shocks are modelled in period three. Each subject is presented with each of the path-types DOWN, STRAIGHT, and UP in random order in such a way that a subject either sees DOWN 1 and UP 2 or vice versa.

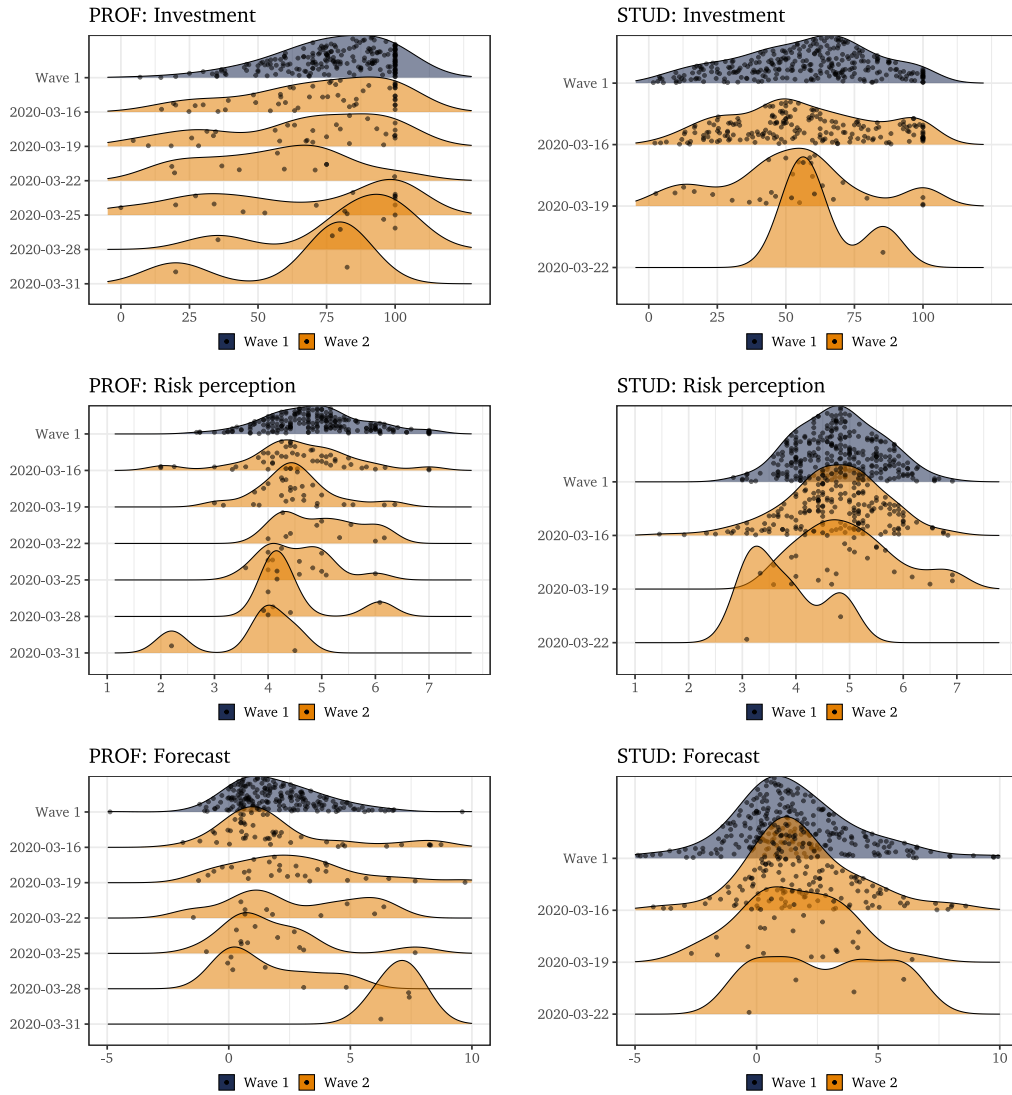

Figure B3: Kernel density plots for investment, risk perception, and return forecasts over time. “WAVE 1” (blue) includes all data from WAVE 1, i.e., all data collected between December 5 and December 12, 2019. The orange kernel densities include all data from WAVE 2 in 3-day intervals, i.e., from March 16 to March 31, 2020. The dots represent the original data points from which the distributions are generated. Return forecasts are converted into price forecasts for better comparability.

## C Additional Tables

Table C1: Between- and within-subjects treatment structure with a  $2 \times 3$  factorial design. The treatment variable “presentation format” was implemented such that subjects were presented with charts composed of either PRICES or RETURNS. The treatment variable “experimental shock” (DOWN, STRAIGHT, or UP) was implemented within-subjects such that each subject experienced all three paths (either in the return or the price chart condition) but in a randomized order.

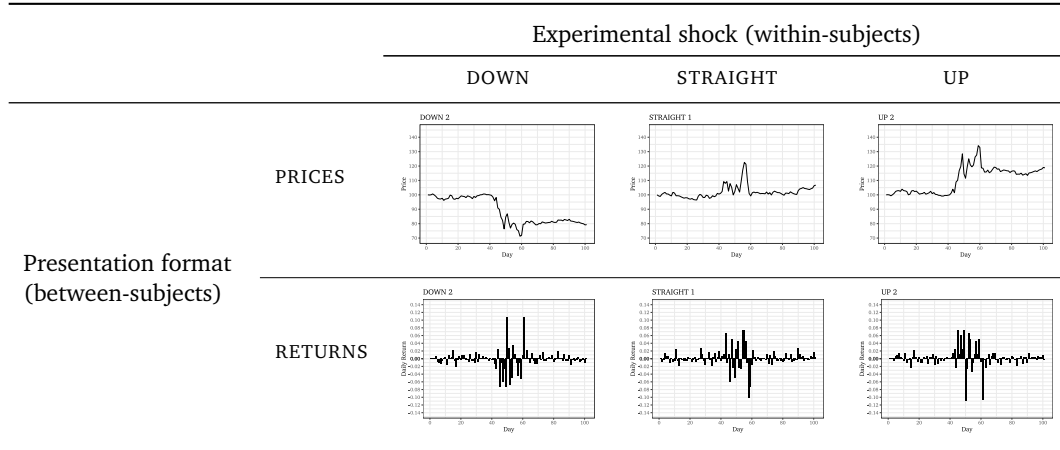



Table C1: Demographic statistics of financial professionals (left column) and student subjects (right column). 'Risk tolerance (general)' measures subjects' risk-taking by using the general risk question from the German Socio-Economic Panel on a Likert-scale from 0 ('not willing to take risk') to 10 ('very willing to take risk')—(GSOEP; see [Dohmen et al., 2011](#)); 'Risk tolerance (financial)' measures subjects' risk-taking in financial matters taken from GSOEP as well; 'CRT2' measures how many out of two cognitive reflection test (CRT) questions from [Toplak et al. \(2014\)](#) were answered correctly (Question 1: 'If John can drink one barrel of water in 6 days, and Mary can drink one barrel of water in 12 days, how long would it take them to drink one barrel of water together?'; Question 2: 'Jerry received both the 15th highest and the 15th lowest mark in the class. How many students are in the class?'); 'Investment in financial products' indicates the fraction of subjects that have invested in financial products during the past five years. Values in column 't' indicate the respective test statistics from *t*-tests between WAVE 1 (December 2019) and WAVE 2 (March 2020); none of the differences between WAVE 1 and WAVE 2 are statistically significant at the 5% level.

| Variable                   | Financial Professionals |        |                |        |          | Students       |        |                |        |          |
|----------------------------|-------------------------|--------|----------------|--------|----------|----------------|--------|----------------|--------|----------|
|                            | WAVE 1                  |        | WAVE 2         |        | <i>t</i> | WAVE 1         |        | WAVE 2         |        | <i>t</i> |
|                            | Mean                    | (s.d.) | Mean           | (s.d.) |          | Mean           | (s.d.) | Mean           | (s.d.) |          |
| Age                        | 37.90                   | (8.49) | 39.23          | (9.49) | 1.24     | 22.70          | (3.06) | 23.19          | (3.34) | 1.70     |
| Female                     | 0.13                    |        | 0.18           |        | 1.08     | 0.46           |        | 0.49           |        | 0.57     |
| Risk tolerance (general)   | 7.60                    | (2.03) | 7.35           | (2.20) | 1.01     | 6.69           | (2.42) | 6.59           | (2.34) | 0.47     |
| Risk tolerance (financial) | 7.77                    | (2.06) | 7.61           | (2.17) | 0.65     | 5.54           | (2.44) | 5.45           | (2.51) | 0.38     |
| CRT2                       | 1.38                    | (0.75) | 1.27           | (0.71) | 1.30     | 1.06           | (0.80) | 1.06           | (0.86) | 0.06     |
| Investment in fin. prod.   |                         |        |                |        |          | 0.33           |        | 0.33           |        | 0.00     |
| Highest lev. of education: |                         |        |                |        |          |                |        |                |        |          |
| Compulsory school          | 0.00                    |        | 0.01           |        |          | 0.01           |        | 0.01           |        |          |
| Apprenticeship             | 0.00                    |        | 0.03           |        |          | 0.00           |        | 0.00           |        |          |
| Technical college          | 0.01                    |        | 0.00           |        |          | 0.02           |        | 0.02           |        |          |
| High school                | 0.07                    |        | 0.16           |        |          | 0.55           |        | 0.46           |        |          |
| University                 | 0.90                    |        | 0.78           |        |          | 0.40           |        | 0.47           |        |          |
| Prefer not to say          | 0.01                    |        | 0.03           |        |          | 0.01           |        | 0.04           |        |          |
| Job function:              |                         |        |                |        |          |                |        |                |        |          |
| Chief-Level Executive      | 0.02                    |        | 0.01           |        |          |                |        |                |        |          |
| Consultant                 | 0.09                    |        | 0.14           |        |          |                |        |                |        |          |
| Financial Advisor          | 0.12                    |        | 0.08           |        |          |                |        |                |        |          |
| Fund Manager               | 0.06                    |        | 0.04           |        |          |                |        |                |        |          |
| Investment Management      | 0.10                    |        | 0.12           |        |          |                |        |                |        |          |
| Portfolio Manager          | 0.19                    |        | 0.15           |        |          |                |        |                |        |          |
| Research Analyst           | 0.05                    |        | 0.06           |        |          |                |        |                |        |          |
| Trader                     | 0.10                    |        | 0.14           |        |          |                |        |                |        |          |
| Other                      | 0.26                    |        | 0.26           |        |          |                |        |                |        |          |
|                            | <i>N</i> = 202          |        | <i>N</i> = 113 |        |          | <i>N</i> = 282 |        | <i>N</i> = 216 |        |          |

Table C2: Summary statistics and differences between WAVE 1 (December 2019) and WAVE 2 (March 2020) for INVESTMENT (percentage invested; from 0 to 100%), RISK PERCEPTION (Likert-scale from 1 to 7), RETURN FORECAST (open question), PRICE FORECAST (open question), and SATISFACTION (Likert-scale from -3 to 3) for financial professionals and student subjects. The data is separated for the presentation format, i.e., RETURNS and PRICES. Columns WAVE 1 and WAVE 2 show mean values for each variable with standard deviations in parentheses. The Diff. columns show the respective differences between WAVE 1 and WAVE 2 for each subject pool; *t*-statistics for differences between waves are provided in parentheses (double-sided *t*-test). The stars \* and \*\* indicate the 5%- and the 0.5%-significance levels, respectively.

| Variable        |         | Financial Professionals |                   |                   | Students          |                   |                  |
|-----------------|---------|-------------------------|-------------------|-------------------|-------------------|-------------------|------------------|
|                 |         | WAVE 1                  | WAVE 2            | Diff.             | WAVE 1            | WAVE 2            | Diff.            |
| INVESTMENT      | RETURNS | 79.52<br>(25.74)        | 74.29<br>(31.94)  | 5.23<br>(1.24)    | 58.63<br>(30.23)  | 57.24<br>(31.06)  | 1.39<br>(0.43)   |
|                 | PRICES  | 74.27<br>(26.36)        | 62.07<br>(30.85)  | 12.19**<br>(2.99) | 56.16<br>(28.84)  | 54.67<br>(29.46)  | 1.50<br>(0.48)   |
| RISK PERCEPTION | RETURNS | 5.04<br>(1.40)          | 4.68<br>(1.29)    | 0.36*<br>(2.41)   | 4.91<br>(1.37)    | 4.91<br>(1.44)    | 0.00<br>(0.07)   |
|                 | PRICES  | 4.74<br>(1.30)          | 4.43<br>(1.28)    | 0.31*<br>(2.19)   | 4.67<br>(1.42)    | 4.53<br>(1.39)    | 0.14<br>(1.44)   |
| RETURN FORECAST | RETURNS | 1.97<br>(2.72)          | 2.59<br>(5.99)    | -0.61<br>(-1.02)  | 6.70<br>(15.80)   | 7.96<br>(19.05)   | -1.26<br>(-0.96) |
|                 | PRICES  | 1.26<br>(12.67)         | 0.70<br>(17.16)   | 0.56<br>(0.18)    | -0.08<br>(15.35)  | -1.18<br>(21.23)  | 1.11<br>(-1.00)  |
| PRICE FORECAST  | RETURNS | 101.18<br>(9.90)        | 101.77<br>(10.76) | -0.59<br>(-0.99)  | 105.98<br>(19.25) | 107.35<br>(22.07) | -1.38<br>(-1.00) |
|                 | PRICES  | 100.31<br>(15.16)       | 99.85<br>(18.65)  | 0.47<br>(0.14)    | 98.94<br>(16.96)  | 98.02<br>(22.47)  | 0.92<br>(-1.00)  |
| SATISFACTION    | RETURNS | -0.19<br>(1.78)         | -0.05<br>(1.66)   | -0.15<br>(-1.11)  | -0.56<br>(1.71)   | -0.54<br>(1.69)   | -0.01<br>(-0.21) |
|                 | PRICES  | -0.05<br>(1.53)         | -0.07<br>(1.40)   | 0.03<br>(0.24)    | -0.50<br>(1.71)   | -0.40<br>(1.65)   | -0.10<br>(-1.53) |
| Observations    | RETURNS | 103                     | 55                |                   | 150               | 111               |                  |
|                 | PRICES  | 99                      | 58                |                   | 132               | 105               |                  |
|                 | Total   | 202                     | 113               |                   | 282               | 216               |                  |

Table C3: INVESTMENT: Tobit regression analyses for each subject pool (financial professionals and students) and each presentation format (RETURNS or PRICES) for both waves. The dependent variable, INVESTMENT, is censored between 0 and 100 percent. WAVE 2 is a dummy variable taking the value 1 for observations from the second wave (March 2020), zero otherwise. Models 4-6 and 10-12 are run with control variables such as a subject's self-reported risk tolerance in general and financial matters following the German-SOEP questions, CRT score, age, and gender. The stars \* and \*\* indicate the 5%- and the 0.5%-significance levels, respectively.

|                          | Dependent variable: INVESTMENT |                     |                     |                     |                      |                     |                     |                     |                     |                    |                    |                    |
|--------------------------|--------------------------------|---------------------|---------------------|---------------------|----------------------|---------------------|---------------------|---------------------|---------------------|--------------------|--------------------|--------------------|
|                          | Financial Professionals        |                     |                     |                     |                      |                     | Students            |                     |                     |                    |                    |                    |
|                          | PRICES<br>(1)                  | RETURNS<br>(2)      | Pooled<br>(3)       | PRICES<br>(4)       | RETURNS<br>(5)       | Pooled<br>(6)       | PRICES<br>(7)       | RETURNS<br>(8)      | Pooled<br>(9)       | PRICES<br>(10)     | RETURNS<br>(11)    | Pooled<br>(12)     |
| WAVE 2                   | -13.105**<br>(4.508)           | -5.769<br>(5.174)   | -9.783**<br>(3.477) | -8.620*<br>(3.978)  | -6.525<br>(4.388)    | -7.543*<br>(2.971)  | -1.502<br>(3.202)   | -1.045<br>(3.469)   | -1.333<br>(2.368)   | -1.952<br>(2.826)  | -0.517<br>(3.058)  | -1.122<br>(2.108)  |
| General risk tolerance   |                                |                     |                     | 2.242<br>(1.560)    | 0.030<br>(1.249)     | 1.027<br>(0.985)    |                     |                     |                     | 2.791**<br>(0.726) | 2.351*<br>(0.882)  | 2.534**<br>(0.590) |
| Financial risk tolerance |                                |                     |                     | 3.797*<br>(1.520)   | 4.111*<br>(1.483)    | 4.169**<br>(0.999)  |                     |                     |                     | 1.419<br>(0.836)   | 3.105**<br>(0.854) | 2.311**<br>(0.605) |
| CRT score                |                                |                     |                     | 6.550*<br>(2.428)   | 9.878**<br>(2.918)   | 8.164**<br>(1.866)  |                     |                     |                     | 1.601<br>(1.732)   | -1.976<br>(1.787)  | -0.245<br>(1.250)  |
| Age                      |                                |                     |                     | -0.214<br>(0.191)   | -0.290<br>(0.268)    | -0.209<br>(0.158)   |                     |                     |                     | 0.796<br>(0.465)   | 0.592<br>(0.477)   | 0.627<br>(0.330)   |
| Female                   |                                |                     |                     | -0.813<br>(5.837)   | -6.890<br>(5.819)    | -3.271<br>(4.008)   |                     |                     |                     | -4.651<br>(3.241)  | -3.274<br>(3.369)  | -4.224<br>(2.324)  |
| Constant                 | 76.376**<br>(2.431)            | 83.346**<br>(2.559) | 79.920**<br>(1.780) | 28.513*<br>(12.053) | 49.969**<br>(16.578) | 36.636**<br>(9.778) | 56.531**<br>(2.073) | 59.340**<br>(2.132) | 58.012**<br>(1.492) | 12.680<br>(13.109) | 16.304<br>(11.962) | 16.230<br>(8.795)  |
| S.e.                     | robust<br>157                  | robust<br>158       | robust<br>315       | robust<br>157       | robust<br>158        | robust<br>315       | robust<br>237       | robust<br>261       | robust<br>498       | robust<br>237      | robust<br>261      | robust<br>498      |
| Log Likelihood           | -657.665                       | -613.999            | -1,277.236          | -635.751            | -595.581             | -1,238.560          | -1,063.082          | -1,166.009          | -2,231.255          | -1,035.125         | -1,131.781         | -2,171.444         |

Table C4: RISK PERCEPTION: Ordered logistic regression analyses for each subject pool (financial professionals and students) and each presentation format (RETURNS or PRICES) for both waves. WAVE 2 is a dummy variable taking the value 1 for observations from the second wave (March 2020), zero otherwise. Models 4-6 and 10-12 are run with control variables such as a subject's self-reported risk tolerance in general and financial matters following the German-SOEP questions, CRT score, age, and gender. The stars \* and \*\* indicate the 5%- and the 0.5%-significance levels, respectively.

|                          | Dependent variable: RISK PERCEPTION |                    |                     |                   |                    |                     |                   |                  |                   |                   |                   |                   |
|--------------------------|-------------------------------------|--------------------|---------------------|-------------------|--------------------|---------------------|-------------------|------------------|-------------------|-------------------|-------------------|-------------------|
|                          | Financial Professionals             |                    |                     |                   |                    |                     | Students          |                  |                   |                   |                   |                   |
|                          | PRICES                              | RETURNS            | Pooled              | PRICES            | RETURNS            | Pooled              | PRICES            | RETURNS          | Pooled            | PRICES            | RETURNS           | Pooled            |
|                          | (1)                                 | (2)                | (3)                 | (4)               | (5)                | (6)                 | (7)               | (8)              | (9)               | (10)              | (11)              | (12)              |
| WAVE 2                   | -0.653*<br>(0.289)                  | -0.666*<br>(0.292) | -0.663**<br>(0.205) | -0.569<br>(0.300) | -0.597*<br>(0.295) | -0.612**<br>(0.208) | -0.250<br>(0.227) | 0.085<br>(0.219) | -0.095<br>(0.157) | -0.242<br>(0.229) | 0.133<br>(0.220)  | -0.069<br>(0.159) |
| General risk tolerance   |                                     |                    |                     | 0.107<br>(0.104)  | 0.118<br>(0.087)   | 0.120<br>(0.067)    |                   |                  |                   | 0.024<br>(0.066)  | -0.021<br>(0.060) | 0.010<br>(0.045)  |
| Financial risk tolerance |                                     |                    |                     | 0.059<br>(0.095)  | -0.180*<br>(0.089) | -0.049<br>(0.065)   |                   |                  |                   | 0.052<br>(0.067)  | 0.055<br>(0.060)  | 0.055<br>(0.045)  |
| CRT score                |                                     |                    |                     | 0.258<br>(0.192)  | 0.534*<br>(0.202)  | 0.377*<br>(0.136)   |                   |                  |                   | 0.019<br>(0.144)  | 0.329*<br>(0.134) | 0.172<br>(0.098)  |
| Age                      |                                     |                    |                     | 0.028<br>(0.016)  | -0.010<br>(0.017)  | 0.015<br>(0.011)    |                   |                  |                   | -0.012<br>(0.038) | -0.050<br>(0.037) | -0.033<br>(0.026) |
| Female                   |                                     |                    |                     | -0.474<br>(0.415) | -0.369<br>(0.387)  | -0.375<br>(0.277)   |                   |                  |                   | -0.107<br>(0.240) | -0.089<br>(0.237) | -0.092<br>(0.167) |
| S.e.                     | robust<br>157                       | robust<br>158      | robust<br>315       | robust<br>157     | robust<br>158      | robust<br>315       | robust<br>237     | robust<br>261    | robust<br>498     | robust<br>237     | robust<br>261     | robust<br>498     |
| Observations             |                                     |                    |                     |                   |                    |                     |                   |                  |                   |                   |                   |                   |

Table C5: INVESTMENT: Ordinary least squares regression analyses for each presentation format (RETURNS or PRICES) for both waves. WAVE 2 is a dummy variable taking the value 1 for observations from the second wave (March 2020), zero otherwise. PROF is a dummy variable taking the value 1 for finance professionals and zero otherwise. Models 4-6 are run with control variables such as a subject's self-reported risk tolerance in general and financial matters following the German-SOEP questions, CRT score, age, and gender. The stars \* and \*\* indicate the 5%- and the 0.5%-significance levels, respectively.

|                          | Dependent variable: INVESTMENT |                     |                     |                     |                     |                     |
|--------------------------|--------------------------------|---------------------|---------------------|---------------------|---------------------|---------------------|
|                          | PRICES                         | RETURNS             | Pooled              | PRICES              | RETURNS             | Pooled              |
|                          | (1)                            | (2)                 | (3)                 | (4)                 | (5)                 | (6)                 |
| WAVE 2                   | -1.497<br>(2.240)              | -1.389<br>(3.221)   | -1.486<br>(2.240)   | -1.711<br>(2.777)   | -0.275<br>(2.860)   | -0.897<br>(2.011)   |
| PROF                     | 18.101**<br>(2.002)            | 20.895**<br>(2.773) | 19.471**<br>(2.002) | 8.740*<br>(3.550)   | 14.284**<br>(4.255) | 11.181**<br>(2.716) |
| WAVE 2 × PROF            | -10.694**<br>(3.719)           | -3.842<br>(5.283)   | -7.439*<br>(3.719)  | -7.707<br>(4.532)   | -5.017<br>(4.678)   | -6.492*<br>(3.284)  |
| General risk tolerance   |                                |                     |                     | 2.614**<br>(0.628)  | 1.453*<br>(0.638)   | 1.976**<br>(0.458)  |
| Financial risk tolerance |                                |                     |                     | 2.137**<br>(0.660)  | 3.286**<br>(0.626)  | 2.783**<br>(0.453)  |
| CRT score                |                                |                     |                     | 3.511*<br>(1.354)   | 1.350<br>(1.345)    | 2.511*<br>(0.959)   |
| Age                      |                                |                     |                     | -0.052<br>(0.167)   | -0.182<br>(0.200)   | -0.108<br>(0.128)   |
| Female                   |                                |                     |                     | -3.778<br>(2.679)   | -3.035<br>(2.593)   | -3.367<br>(1.854)   |
| Constant                 | 56.164**<br>(1.418)            | 58.626**<br>(2.001) | 57.473**<br>(1.418) | 26.606**<br>(6.469) | 34.426**<br>(7.078) | 30.209**<br>(4.733) |
| S.e.                     | robust                         | robust              | robust              | robust              | robust              | robust              |
| Observations             | 394                            | 419                 | 813                 | 394                 | 419                 | 813                 |
| R <sup>2</sup>           | 0.104                          | 0.136               | 0.116               | 0.294               | 0.312               | 0.296               |
| Adjusted R <sup>2</sup>  | 0.097                          | 0.129               | 0.112               | 0.280               | 0.299               | 0.289               |

Table C6: RISK PERCEPTION: Ordinary least squares regression analyses for each presentation format (RETURNS or PRICES) for both waves. WAVE 2 is a dummy variable taking the value 1 for observations from the second wave (March 2020), zero otherwise. PROF is a dummy variable taking the value 1 for finance professionals and zero otherwise. Models 4-6 are run with control variables such as a subject's self-reported risk tolerance in general and financial matters following the German-SOEP questions, CRT score, age, and gender. The stars \* and \*\* indicate the 5%- and the 0.5%-significance levels, respectively.

|                          | Dependent variable: RISK PERCEPTION |                    |                    |                    |                    |                    |
|--------------------------|-------------------------------------|--------------------|--------------------|--------------------|--------------------|--------------------|
|                          | PRICES                              | RETURNS            | Pooled             | PRICES             | RETURNS            | Pooled             |
|                          | (1)                                 | (2)                | (3)                | (4)                | (5)                | (6)                |
| WAVE 2                   | -0.144<br>(0.078)                   | -0.008<br>(0.115)  | -0.079<br>(0.078)  | -0.153<br>(0.100)  | 0.016<br>(0.113)   | -0.076<br>(0.077)  |
| PROF                     | 0.070<br>(0.079)                    | 0.129<br>(0.113)   | 0.095<br>(0.079)   | -0.236<br>(0.151)  | 0.166<br>(0.170)   | -0.074<br>(0.116)  |
| WAVE 2 × PROF            | -0.167<br>(0.131)                   | -0.368<br>(0.193)  | -0.271*<br>(0.131) | -0.158<br>(0.173)  | -0.378*<br>(0.188) | -0.259*<br>(0.131) |
| General risk tolerance   |                                     |                    |                    | 0.004<br>(0.027)   | 0.027<br>(0.029)   | 0.022<br>(0.020)   |
| Financial risk tolerance |                                     |                    |                    | 0.035<br>(0.026)   | -0.016<br>(0.027)  | 0.009<br>(0.019)   |
| CRT score                |                                     |                    |                    | 0.048<br>(0.049)   | 0.159**<br>(0.054) | 0.102*<br>(0.037)  |
| Age                      |                                     |                    |                    | 0.013<br>(0.007)   | -0.006<br>(0.008)  | 0.005<br>(0.005)   |
| Female                   |                                     |                    |                    | -0.075<br>(0.083)  | -0.091<br>(0.101)  | -0.064<br>(0.067)  |
| Constant                 | 4.667**<br>(0.046)                  | 4.912**<br>(0.063) | 4.797**<br>(0.046) | 4.139**<br>(0.236) | 4.829**<br>(0.263) | 4.408**<br>(0.179) |
| S.e.                     | robust                              | robust             | robust             | robust             | robust             | robust             |
| Observations             | 394                                 | 419                | 813                | 394                | 419                | 813                |
| R <sup>2</sup>           | 0.019                               | 0.015              | 0.015              | 0.050              | 0.042              | 0.034              |
| Adjusted R <sup>2</sup>  | 0.011                               | 0.008              | 0.012              | 0.031              | 0.023              | 0.025              |

Table C7: RETURN FORECAST: Ordinary least squares regression analyses for each presentation format (RETURNS or PRICES) for both waves. WAVE 2 is a dummy variable taking the value 1 for observations from the second wave (March 2020), zero otherwise. PROF is a dummy variable taking the value 1 for finance professionals and zero otherwise. Models 4-6 are run with control variables such as a subject's self-reported risk tolerance in general and financial matters following the German-SOEP questions, CRT score, age, and gender. The stars \* and \*\* indicate the 5%- and the 0.5%-significance levels, respectively.

|                          | Dependent variable: RETURN FORECAST |                     |                    |                   |                     |                    |
|--------------------------|-------------------------------------|---------------------|--------------------|-------------------|---------------------|--------------------|
|                          | PRICES                              | RETURNS             | Pooled             | PRICES            | RETURNS             | Pooled             |
|                          | (1)                                 | (2)                 | (3)                | (4)               | (5)                 | (6)                |
| WAVE 2                   | -0.671<br>(1.495)                   | 1.203<br>(2.014)    | 0.170<br>(1.495)   | -0.649<br>(2.042) | 1.016<br>(1.982)    | 0.202<br>(1.466)   |
| PROF                     | 1.342<br>(0.907)                    | -4.727**<br>(1.206) | -1.902*<br>(0.907) | 1.187<br>(2.474)  | -3.794*<br>(1.761)  | -1.241<br>(1.633)  |
| WAVE 2 × PROF            | 0.145<br>(1.861)                    | -0.590<br>(2.100)   | -0.158<br>(1.861)  | 0.341<br>(3.116)  | -0.356<br>(2.091)   | -0.233<br>(1.881)  |
| General risk tolerance   |                                     |                     |                    | 0.500<br>(0.447)  | 0.429<br>(0.326)    | 0.519<br>(0.282)   |
| Financial risk tolerance |                                     |                     |                    | 0.245<br>(0.314)  | 0.130<br>(0.387)    | 0.127<br>(0.260)   |
| CRT score                |                                     |                     |                    | -0.168<br>(0.965) | -2.554**<br>(0.804) | -1.489*<br>(0.642) |
| Age                      |                                     |                     |                    | -0.032<br>(0.138) | -0.014<br>(0.069)   | -0.030<br>(0.080)  |
| Female                   |                                     |                     |                    | 1.185<br>(1.400)  | 1.814<br>(1.376)    | 1.464<br>(1.020)   |
| Constant                 | -0.079<br>(0.800)                   | 6.700**<br>(1.196)  | 3.527**<br>(0.800) | -4.321<br>(4.879) | 5.245<br>(3.460)    | 0.932<br>(3.082)   |
| S.e.                     | robust                              | robust              | robust             | robust            | robust              | robust             |
| Observations             | 394                                 | 419                 | 813                | 394               | 419                 | 813                |
| R <sup>2</sup>           | 0.003                               | 0.038               | 0.005              | 0.016             | 0.073               | 0.025              |
| Adjusted R <sup>2</sup>  | -0.004                              | 0.031               | 0.001              | -0.005            | 0.055               | 0.015              |

Table C8: Ordinary least squares regression analyses for financial professionals with pooled presentation formats (RETURNS and PRICES) for both waves. WAVE 2 is a dummy variable taking the value 1 for observations from the second wave (March 2020), zero otherwise. INVESTMENT is the dependent variable in models 1–4, RISK PERCEPTION is the dependent variable in models 5–8. All models include control variables as well as interactions terms between one or all control variables and WAVE 2. The stars \* and \*\* indicate the 5% and the 0.5% significance levels, respectively.

|                            | Investment           |                     |                     |                      | Risk perception    |                    |                     |                    | Return forecast    |                    |                     |                    |
|----------------------------|----------------------|---------------------|---------------------|----------------------|--------------------|--------------------|---------------------|--------------------|--------------------|--------------------|---------------------|--------------------|
|                            | (1)                  | (2)                 | (3)                 | (4)                  | (5)                | (6)                | (7)                 | (8)                | (9)                | (10)               | (11)                | (12)               |
| WAVE 2                     | -25.444*<br>(10.402) | -21.449<br>(11.121) | -6.048*<br>(2.692)  | -25.273*<br>(11.946) | 0.120<br>(0.471)   | 0.235<br>(0.376)   | -0.337**<br>(0.120) | 0.275<br>(0.444)   | 0.120<br>(0.471)   | 0.235<br>(0.376)   | -0.337**<br>(0.120) | 0.275<br>(0.444)   |
| General risk tolerance     | 0.195<br>(0.872)     | 1.092<br>(0.775)    | 1.139<br>(0.787)    | 0.283<br>(0.925)     | 0.074<br>(0.043)   | 0.053<br>(0.042)   | 0.051<br>(0.041)    | 0.061<br>(0.046)   | 0.074<br>(0.043)   | 0.053<br>(0.042)   | 0.051<br>(0.041)    | 0.061<br>(0.046)   |
| Financial risk tolerance   | 3.501**<br>(0.818)   | 2.851**<br>(0.889)  | 3.598**<br>(0.816)  | 3.422**<br>(0.995)   | -0.026<br>(0.037)  | -0.0001<br>(0.041) | -0.028<br>(0.037)   | -0.005<br>(0.042)  | -0.026<br>(0.037)  | -0.0001<br>(0.041) | -0.028<br>(0.037)   | -0.005<br>(0.042)  |
| GRT score                  | 6.792**<br>(1.601)   | 6.627**<br>(1.620)  | 6.660**<br>(1.623)  | 6.760**<br>(1.611)   | 0.200**<br>(0.068) | 0.204**<br>(0.068) | 0.203**<br>(0.068)  | 0.203**<br>(0.068) | 0.200**<br>(0.068) | 0.204**<br>(0.068) | 0.203**<br>(0.068)  | 0.203**<br>(0.068) |
| Age                        | -0.218<br>(0.137)    | -0.226<br>(0.138)   | -0.211<br>(0.140)   | -0.210<br>(0.138)    | 0.010<br>(0.006)   | 0.010<br>(0.006)   | 0.010<br>(0.006)    | 0.010<br>(0.006)   | 0.010<br>(0.006)   | 0.010<br>(0.006)   | 0.010<br>(0.006)    | 0.010<br>(0.006)   |
| Female                     | -3.372<br>(3.387)    | -3.590<br>(3.468)   | -0.773<br>(4.146)   | -1.585<br>(4.283)    | -0.153<br>(0.136)  | -0.143<br>(0.142)  | -0.192<br>(0.175)   | -0.155<br>(0.178)  | -0.153<br>(0.136)  | -0.143<br>(0.142)  | -0.192<br>(0.175)   | -0.155<br>(0.178)  |
| WAVE 2 × General risk tol. | 2.497*<br>(1.273)    |                     |                     | 2.216<br>(1.713)     | -0.060<br>(0.059)  |                    |                     | -0.020<br>(0.094)  | -0.060<br>(0.059)  |                    |                     | -0.020<br>(0.094)  |
| WAVE 2 × Fin. risk tol.    |                      | 1.901<br>(1.299)    |                     | 0.329<br>(1.731)     |                    | -0.073<br>(0.049)  |                     | -0.059<br>(0.084)  |                    | -0.073<br>(0.049)  |                     | -0.059<br>(0.084)  |
| WAVE 2 × Female            |                      |                     | -5.372<br>(7.019)   | -3.980<br>(6.979)    |                    |                    | 0.079<br>(0.274)    | 0.024<br>(0.282)   |                    | 0.079<br>(0.274)   |                     | 0.024<br>(0.282)   |
| Constant                   | 47.616**<br>(9.198)  | 46.390**<br>(9.436) | 39.261**<br>(8.743) | 47.076**<br>(9.804)  | 3.891**<br>(0.381) | 3.833**<br>(0.370) | 4.082**<br>(0.356)  | 3.823**<br>(0.382) | 3.891**<br>(0.381) | 3.833**<br>(0.370) | 4.082**<br>(0.356)  | 3.823**<br>(0.382) |
| S.e.                       | robust<br>315        | robust<br>315       | robust<br>315       | robust<br>315        | robust<br>315      | robust<br>315      | robust<br>315       | robust<br>315      | robust<br>315      | robust<br>315      | robust<br>315       | robust<br>315      |
| Observations               | 0.273                | 0.268               | 0.263               | 0.274                | 0.078              | 0.080              | 0.074               | 0.080              | 0.078              | 0.080              | 0.074               | 0.080              |
| R <sup>2</sup>             | 0.256                | 0.251               | 0.246               | 0.253                | 0.057              | 0.059              | 0.053               | 0.053              | 0.057              | 0.059              | 0.053               | 0.053              |
| Adjusted R <sup>2</sup>    |                      |                     |                     |                      |                    |                    |                     |                    |                    |                    |                     |                    |



Table C9: Ordinary least squares regression analyses for financial professionals with pooled presentation formats (RETURNS and PRICES) for both waves. INVESTMENT is the dependent variable. Models 2 and 4 are run with control variables such as a subject's self-reported risk tolerance in general and financial matters following the German-SOEP questions, CRT score, age, and gender. The stars \* and \*\* indicate the 5% and the 0.5% significance levels, respectively.

|                          | Dependent variable: INVESTMENT |                      |                      |                    |
|--------------------------|--------------------------------|----------------------|----------------------|--------------------|
|                          | WAVE 1                         |                      | WAVE 2               |                    |
|                          | (1)                            | (2)                  | (3)                  | (4)                |
| Finance Professionals    |                                |                      |                      |                    |
| RISK PERCEPTION          | 1.777<br>(1.492)               | 0.437<br>(1.390)     | 3.734<br>(3.004)     | 3.118<br>(2.594)   |
| RETURN FORECAST          | 0.050<br>(0.118)               | -0.160<br>(0.182)    | -0.091<br>(0.158)    | 0.021<br>(0.135)   |
| General risk tolerance   |                                | 0.256<br>(0.907)     |                      | 2.621<br>(1.471)   |
| Financial risk tolerance |                                | 3.567**<br>(0.974)   |                      | 3.635*<br>(1.513)  |
| CRT score                |                                | 4.955*<br>(1.779)    |                      | 9.911**<br>(3.147) |
| Age                      |                                | -0.131<br>(0.166)    |                      | -0.378<br>(0.231)  |
| Female                   |                                | -1.380<br>(4.399)    |                      | -4.633<br>(5.262)  |
| Constant                 | 68.168**<br>(7.599)            | 43.720**<br>(12.553) | 51.208**<br>(14.158) | 10.002<br>(16.828) |
| Controls                 | No                             | Yes                  | No                   | Yes                |
| S.e.                     | robust                         | robust               | robust               | robust             |
| Observations             | 202                            | 202                  | 113                  | 113                |
| R <sup>2</sup>           | 0.007                          | 0.201                | 0.014                | 0.324              |
| Adjusted R <sup>2</sup>  | -0.003                         | 0.172                | -0.004               | 0.279              |

Table C10: Ordinary least squares regression analyses for students with pooled presentation formats (RETURNS and PRICES) for both waves. INVESTMENT is the dependent variable. Models 2 and 4 are run with control variables such as a subject's self-reported risk tolerance in general and financial matters following the German-SOEP questions, CRT score, age, and gender. The stars \* and \*\* indicate the 5% and the 0.5% significance levels, respectively.

| Students                 | Dependent variable: INVESTMENT |                     |                     |                    |
|--------------------------|--------------------------------|---------------------|---------------------|--------------------|
|                          | WAVE 1                         |                     | WAVE 2              |                    |
|                          | (1)                            | (2)                 | (3)                 | (4)                |
| RISK PERCEPTION          | 0.804<br>(1.965)               | -0.462<br>(1.755)   | 2.461<br>(2.117)    | 1.275<br>(1.818)   |
| RETURN FORECAST          | 0.088<br>(0.097)               | -0.003<br>(0.085)   | 0.261**<br>(0.069)  | 0.244**<br>(0.085) |
| General risk tolerance   |                                | 2.545**<br>(0.704)  |                     | 1.951*<br>(0.883)  |
| Financial risk tolerance |                                | 2.494**<br>(0.704)  |                     | 1.938*<br>(0.903)  |
| CRT score                |                                | 0.174<br>(1.530)    |                     | -0.213<br>(1.812)  |
| Age                      |                                | 0.058<br>(0.438)    |                     | 1.307**<br>(0.454) |
| Female                   |                                | -1.351<br>(2.698)   |                     | -7.601*<br>(3.696) |
| Constant                 | 53.308**<br>(9.622)            | 27.988*<br>(12.966) | 43.410**<br>(9.935) | -0.720<br>(15.938) |
| Controls                 | No                             | Yes                 | No                  | Yes                |
| S.e.                     | robust                         | robust              | robust              | robust             |
| Observations             | 282                            | 282                 | 216                 | 216                |
| R <sup>2</sup>           | 0.003                          | 0.227               | 0.043               | 0.258              |
| Adjusted R <sup>2</sup>  | -0.004                         | 0.207               | 0.034               | 0.233              |

Table C11: Ordinary least squares regression analyses for students with pooled presentation formats (RETURNS and PRICES). INVESTMENT is the dependent variable. “Investing” is a binary variable taking the value 1 for participants who answer “Yes” on the survey question “Have you invested in financial products (e.g. stocks, funds, etc.) in the last 5 years?” and 0 otherwise. “Financial news” is a binary variable taking the value 1 for participants who answer “Daily” or “Several times a week” on the survey question “How many times have you informed yourself about financial news in the last month?” Models 2 and 4 are run with control variables such as a subject’s self-reported risk tolerance in general and financial matters following the German-SOEP questions, CRT score, age, and gender. The stars \* and \*\* indicate the 5% and the 0.5% significance levels, respectively.

|                          | Dependent variable: INVESTMENT |                    |                     |                    |
|--------------------------|--------------------------------|--------------------|---------------------|--------------------|
|                          | (1)                            | (2)                | (3)                 | (4)                |
| WAVE 2                   | -2.431<br>(2.643)              | -2.159<br>(2.415)  | -2.202<br>(2.662)   | -0.669<br>(2.417)  |
| Investing                | 10.372**<br>(2.941)            | 1.918<br>(2.835)   |                     |                    |
| Investing × WAVE 2       | 2.836<br>(4.670)               | 2.752<br>(4.240)   |                     |                    |
| Financial news           |                                |                    | 7.016*<br>(3.225)   | -0.132<br>(2.982)  |
| Financial news × WAVE 2  |                                |                    | -1.292<br>(4.825)   | -1.345<br>(4.360)  |
| General risk tolerance   |                                | 2.442**<br>(0.548) |                     | 2.458**<br>(0.547) |
| Financial risk tolerance |                                | 2.035**<br>(0.574) |                     | 2.240**<br>(0.580) |
| CRT score                |                                | -0.372<br>(1.197)  |                     | -0.289<br>(1.190)  |
| Age                      |                                | 0.537<br>(0.321)   |                     | 0.611<br>(0.317)   |
| Female                   |                                | -3.624<br>(2.233)  |                     | -4.051<br>(2.227)  |
| Constant                 | 54.016**<br>(1.702)            | 19.115*<br>(8.405) | 55.831**<br>(1.628) | 16.982*<br>(8.453) |
| Controls                 | No                             | Yes                | No                  | Yes                |
| S.e.                     | robust                         | robust             | robust              | robust             |
| Observations             | 498                            | 498                | 498                 | 498                |
| R <sup>2</sup>           | 0.051                          | 0.222              | 0.015               | 0.219              |
| Adjusted R <sup>2</sup>  | 0.045                          | 0.209              | 0.009               | 0.206              |

Table C12: Ordinary least squares regression analyses for students with pooled presentation formats (RETURNS and PRICES). RISK PERCEPTION is the dependent variable. “Investing” is a binary variable taking the value 1 for participants who answer “Yes” on the survey question “Have you invested in financial products (e.g. stocks, funds, etc.) in the last 5 years?” and 0 otherwise. “Financial news” is a binary variable taking the value 1 for participants who answer “Daily” or “Several times a week” on the survey question “How many times have you informed yourself about financial news in the last month?” Models 2 and 4 are run with control variables such as a subject’s self-reported risk tolerance in general and financial matters following the German-SOEP questions, CRT score, age, and gender. The stars \* and \*\* indicate the 5% and the 0.5% significance levels, respectively.

|                          | Dependent variable: RISK PERCEPTION |                    |                    |                    |
|--------------------------|-------------------------------------|--------------------|--------------------|--------------------|
|                          | (1)                                 | (2)                | (3)                | (4)                |
| WAVE 2                   | −0.101<br>(0.097)                   | −0.097<br>(0.097)  | −0.011<br>(0.096)  | 0.006<br>(0.095)   |
| Investing                | 0.107<br>(0.092)                    | 0.037<br>(0.101)   |                    |                    |
| Investing × WAVE 2       | 0.067<br>(0.160)                    | 0.094<br>(0.158)   |                    |                    |
| Financial news           |                                     |                    | 0.181<br>(0.102)   | 0.107<br>(0.105)   |
| Financial news × WAVE 2  |                                     |                    | −0.242<br>(0.164)  | −0.223<br>(0.161)  |
| General risk tolerance   |                                     | 0.015<br>(0.022)   |                    | 0.014<br>(0.021)   |
| Financial risk tolerance |                                     | 0.018<br>(0.022)   |                    | 0.024<br>(0.022)   |
| CRT score                |                                     | 0.072<br>(0.046)   |                    | 0.073<br>(0.046)   |
| Age                      |                                     | −0.017<br>(0.015)  |                    | −0.014<br>(0.015)  |
| Female                   |                                     | −0.035<br>(0.078)  |                    | −0.037<br>(0.078)  |
| Constant                 | 4.762**<br>(0.059)                  | 4.911**<br>(0.358) | 4.755**<br>(0.053) | 4.806**<br>(0.357) |
| Controls                 | No                                  | Yes                | No                 | Yes                |
| S.e.                     | robust                              | robust             | robust             | robust             |
| Observations             | 498                                 | 498                | 498                | 498                |
| R <sup>2</sup>           | 0.008                               | 0.024              | 0.007              | 0.025              |
| Adjusted R <sup>2</sup>  | 0.002                               | 0.008              | 0.001              | 0.009              |

Table C13: Ordinary least squares regression analyses for students with pooled presentation formats (RETURNS and PRICES). RETURN FORECAST is the dependent variable. “Investing” is a binary variable taking the value 1 for participants who answer “Yes” on the survey question “Have you invested in financial products (e.g. stocks, funds, etc.) in the last 5 years?” and 0 otherwise. “Financial news” is a binary variable taking the value 1 for participants who answer “Daily” or “Several times a week” on the survey question “How many times have you informed yourself about financial news in the last month?” Models 2 and 4 are run with control variables such as a subject’s self-reported risk tolerance in general and financial matters following the German-SOEP questions, CRT score, age, and gender. The stars \* and \*\* indicate the 5% and the 0.5% significance levels, respectively.

|                          | Dependent variable: RETURN FORECAST |                    |                    |                    |
|--------------------------|-------------------------------------|--------------------|--------------------|--------------------|
|                          | (1)                                 | (2)                | (3)                | (4)                |
| WAVE 2                   | -0.242<br>(1.852)                   | -0.094<br>(1.788)  | 0.209<br>(2.094)   | 0.476<br>(2.080)   |
| Investing                | 0.474<br>(1.378)                    | 0.620<br>(1.501)   |                    |                    |
| Investing × WAVE 2       | 1.235<br>(3.132)                    | 1.532<br>(2.963)   |                    |                    |
| Financial news           |                                     |                    | -0.263<br>(1.195)  | -0.338<br>(1.381)  |
| Financial news × WAVE 2  |                                     |                    | 0.017<br>(2.717)   | -0.003<br>(2.686)  |
| General risk tolerance   |                                     | 0.848*<br>(0.379)  |                    | 0.858*<br>(0.391)  |
| Financial risk tolerance |                                     | -0.030<br>(0.360)  |                    | 0.048<br>(0.398)   |
| CRT score                |                                     | -2.055*<br>(0.884) |                    | -2.023*<br>(0.889) |
| Age                      |                                     | -0.456<br>(0.286)  |                    | -0.426<br>(0.289)  |
| Female                   |                                     | 1.979<br>(1.268)   |                    | 1.776<br>(1.287)   |
| Constant                 | 3.369**<br>(1.134)                  | 9.431<br>(7.324)   | 3.588**<br>(1.028) | 8.593<br>(7.507)   |
| Controls                 | No                                  | Yes                | No                 | Yes                |
| S.e.                     | robust                              | robust             | robust             | robust             |
| Observations             | 498                                 | 498                | 498                | 498                |
| R <sup>2</sup>           | 0.001                               | 0.041              | 0.0001             | 0.039              |
| Adjusted R <sup>2</sup>  | -0.005                              | 0.025              | -0.006             | 0.023              |
